# Supplementary material for: Comparison of healthcare resource utilization and costs among patients with migraine with potentially adequate and insufficient triptan response
Source: PubMed Central journal article supplement — Cephalalgia. 2020 Mar 29;40(7):639–49. doi: 10.1177/0333102420915167 (PMC7273744; doi:10.1177/0333102420915167), 2020-03-29
Supplement: CEP915167_Supplemental_Tables.pdf [file CEP915167_Supplemental_Tables.pdf]

# APPENDIX

**Appendix Table 1. List of Acute Treatment Medications**

| Level A                                                                                                                   | Level B                                                                        | Level C                                                         | Level U                    | Others                                           |
|---------------------------------------------------------------------------------------------------------------------------|--------------------------------------------------------------------------------|-----------------------------------------------------------------|----------------------------|--------------------------------------------------|
| <b>Analgesics</b><br>Acetaminophen                                                                                        | <b>Ergots</b><br>Ergotamine/caffeine                                           | <b>Ergot</b><br>Ergotamine                                      | <b>NSAIDs</b><br>Celecoxib | <b>NSAIDs</b><br>Ketorolac<br>tromethamine spray |
| <b>Ergots</b><br>Dihydroergotamine                                                                                        | <b>NSAIDs</b><br>Flurbiprofen<br>Ketoprofen                                    | <b>NSAIDs</b><br>Phenazone                                      |                            |                                                  |
| <b>NSAIDs</b><br>Aspirin<br>Diclofenac<br>Ibuprofen<br>Naproxen                                                           | <b>Others</b><br>Isometheptene                                                 | <b>Opioid</b><br>Codeine                                        |                            |                                                  |
| <b>Opioids</b><br>Butorphanol nasal spray                                                                                 | <b>Combinations</b><br>Codeine/<br>acetaminophen<br>Tramadol/<br>acetaminophen | <b>Others</b><br>Butalbital                                     |                            |                                                  |
| <b>Opioids</b><br>Butorphanol nasal spray                                                                                 |                                                                                | <b>Combination</b><br>Butalbital/<br>acetaminophen/<br>caffeine |                            |                                                  |
| <b>Triptans</b><br>Almotriptan<br>Eletriptan<br>Frovatriptan<br>Naratriptan<br>Rizatriptan<br>Sumatriptan<br>Zolmitriptan |                                                                                |                                                                 |                            |                                                  |
| <b>Combinations</b><br>Acetaminophen/<br>aspirin/caffeine<br>Sumatriptan/naproxen                                         |                                                                                |                                                                 |                            |                                                  |

This list was adapted from the 2000 American Academy of Neurology Review  
 NSAID – non-steroidal anti-inflammatory drug.

**Appendix Table 2. Family and Link Functions Used in Generalized Linear Model (GLM) Regressions**

| Outcome**                                   | 1-12 months |               | 13-24 months |               |
|---------------------------------------------|-------------|---------------|--------------|---------------|
|                                             | Family      | Link Function | Family       | Link Function |
| <b>HRU</b>                                  |             |               |              |               |
| Migraine and/or HA-related physician visits | Gamma       | Power 0.2     | Gamma        | Power -0.1    |
| <b>Costs</b>                                |             |               |              |               |
| All-cause total costs                       | Poisson     | Power -0.1    | Poisson      | Power 0       |
| Migraine and/or HA-related total costs      | Gamma       | Power 0       | Gamma        | Power 0.2     |

\*\* Remaining outcomes were run as logistic regressions

**Appendix Table 3. Patient Demographic and Clinical Characteristics**

| Characteristic, n (%)                                                                                        | Triptan-Only<br>Continuers<br>N = 4,371 | Potential TIR Patients<br>(N=3,102) |                                                                |                                                               |
|--------------------------------------------------------------------------------------------------------------|-----------------------------------------|-------------------------------------|----------------------------------------------------------------|---------------------------------------------------------------|
|                                                                                                              |                                         | All<br>N = 3,102                    | Triptan<br>Discontinuers with Triptan<br>Acute Meds<br>N = 944 | Triptan<br>Continuers with Triptan<br>Acute Meds<br>N = 2,158 |
| <b>Age (years)</b>                                                                                           |                                         |                                     |                                                                |                                                               |
| 18–24                                                                                                        | 494 (11.3)                              | 314 (10.1)                          | 128 (13.6)                                                     | 186 (8.6)                                                     |
| 25–34                                                                                                        | 865 (19.8)                              | 658 (21.2)                          | 221 (23.4)                                                     | 437 (20.3)                                                    |
| 35–44                                                                                                        | 1,391 (31.8)                            | 996 (32.1)                          | 269 (28.5)                                                     | 727 (33.7)                                                    |
| 45+                                                                                                          | 1,621 (37.1)                            | 1,134 (36.6)                        | 326 (34.5)                                                     | 808 (37.4)                                                    |
| <b>Gender</b>                                                                                                |                                         |                                     |                                                                |                                                               |
| Female                                                                                                       | 3,583 (82.0)                            | 2,592 (83.6)                        | 764 (80.9)                                                     | 1,828 (84.7)                                                  |
| Male                                                                                                         | 788 (18.0)                              | 510 (16.4)                          | 180 (19.1)                                                     | 330 (15.3)                                                    |
| <b>Region</b>                                                                                                |                                         |                                     |                                                                |                                                               |
| Northeast                                                                                                    | 333 (7.6)                               | 220 (7.1)                           | 74 (7.8)                                                       | 146 (6.8)                                                     |
| Midwest                                                                                                      | 1,332 (30.5)                            | 835 (26.9)                          | 243 (25.7)                                                     | 592 (27.4)                                                    |
| South                                                                                                        | 1,788 (40.9)                            | 1,406 (45.3)                        | 444 (47.0)                                                     | 962 (44.6)                                                    |
| West                                                                                                         | 918 (21.0)                              | 641 (20.7)                          | 183 (19.4)                                                     | 458 (21.2)                                                    |
| <b>Plan type</b>                                                                                             |                                         |                                     |                                                                |                                                               |
| Point of service                                                                                             | 3,384 (77.4)                            | 2,439 (78.6)                        | 733 (77.6)                                                     | 1,706 (79.1)                                                  |
| Health maintenance organization                                                                              | 405 (9.3)                               | 280 (9.0)                           | 84 (8.9)                                                       | 196 (9.1)                                                     |
| Other*                                                                                                       | 582 (13.3)                              | 383 (12.3)                          | 127 (13.5)                                                     | 256 (11.8)                                                    |
| <b>Elixhauser comorbidity count</b>                                                                          |                                         |                                     |                                                                |                                                               |
| 0                                                                                                            | 1,953 (44.7)                            | 1,022 (32.9)                        | 349 (37.0)                                                     | 673 (31.2)                                                    |
| 1                                                                                                            | 1,265 (28.9)                            | 894 (28.8)                          | 263 (27.9)                                                     | 631 (29.2)                                                    |
| 2–3                                                                                                          | 913 (20.9)                              | 815 (26.3)                          | 236 (25.0)                                                     | 579 (26.8)                                                    |
| 4+                                                                                                           | 240 (5.5)                               | 371 (12.0)                          | 96 (10.2)                                                      | 275 (12.7)                                                    |
| <b>Migraine-related comorbidities</b>                                                                        |                                         |                                     |                                                                |                                                               |
| Pain                                                                                                         | 970 (22.2)                              | 1,125 (36.3)                        | 309 (32.7)                                                     | 816 (37.8)                                                    |
| Mood disorders                                                                                               | 864 (19.8)                              | 906 (29.2)                          | 242 (25.6)                                                     | 664 (30.8)                                                    |
| Rhinitis                                                                                                     | 753 (17.2)                              | 611 (19.7)                          | 176 (18.6)                                                     | 435 (20.2)                                                    |
| Sleep disturbances                                                                                           | 404 (9.2)                               | 517 (16.7)                          | 134 (14.2)                                                     | 383 (17.7)                                                    |
| <b>Cardiovascular disease-related comorbidities</b>                                                          |                                         |                                     |                                                                |                                                               |
| Hyperlipidemia                                                                                               | 875 (20.0)                              | 729 (23.5)                          | 217 (23.0)                                                     | 512 (23.7)                                                    |
| Hypertension                                                                                                 | 733 (16.8)                              | 708 (22.8)                          | 216 (22.9)                                                     | 492 (22.8)                                                    |
| Obesity                                                                                                      | 327 (7.5)                               | 334 (10.8)                          | 98 (10.4)                                                      | 236 (10.9)                                                    |
| Ischemic disease (coronary heart disease,<br>peripheral vascular disease, and/or<br>cerebrovascular disease) | 181 (4.1)                               | 235 (7.6)                           | 69 (7.4)                                                       | 166 (7.7)                                                     |
| <b>Index triptan agent</b>                                                                                   |                                         |                                     |                                                                |                                                               |
| Sumatriptan                                                                                                  | 2,702 (61.8)                            | 1,972 (63.6)                        | 631 (66.8)                                                     | 1,341 (62.1)                                                  |
| Rizatriptan                                                                                                  | 814 (18.6)                              | 557 (18.0)                          | 167 (17.7)                                                     | 390 (18.1)                                                    |
| Eletriptan                                                                                                   | 437 (10.0)                              | 293 (9.4)                           | 69 (7.3)                                                       | 224 (10.4)                                                    |
| Zolmitriptan                                                                                                 | 199 (4.6)                               | 115 (3.7)                           | 28 (3.0)                                                       | 87 (4.0)                                                      |
| Naratriptan                                                                                                  | 88 (2.0)                                | 71 (2.3)                            | 17 (1.8)                                                       | 54 (2.5)                                                      |
| Frovatriptan                                                                                                 | 73 (1.7)                                | 58 (1.9)                            | 20 (2.1)                                                       | 38 (1.8)                                                      |
| Almotriptan                                                                                                  | 36 (0.8)                                | 18 (0.6)                            | 5 (0.5)                                                        | 13 (0.6)                                                      |
| Sumatriptan combination                                                                                      | 22 (0.5)                                | 18 (0.6)                            | 7 (0.7)                                                        | 11 (0.5)                                                      |
| <b>Presence of chronic migraine diagnosis</b>                                                                | 228 (5.2)                               | 286 (9.2)                           | 74 (7.8)                                                       | 212 (9.8)                                                     |
| <b>Pre-index count of distinct medication classes<br/>for acute treatment of migraine**</b>                  |                                         |                                     |                                                                |                                                               |
| 0                                                                                                            | 3359 (76.8)                             | 1711 (55.2)                         | 580 (61.4)                                                     | 1,131 (52.4)                                                  |
| 1                                                                                                            | 888 (20.3)                              | 1115 (35.9)                         | 289 (30.6)                                                     | 826 (38.3)                                                    |
| 2+                                                                                                           | 124 (2.8)                               | 276 (8.9)                           | 75 (7.9)                                                       | 201 (9.3)                                                     |
| <b>Pre-index migraine-related inpatient or<br/>emergency department visit</b>                                | 489 (11.2)                              | 626 (20.2)                          | 179 (19.0)                                                     | 447 (20.7)                                                    |

**Pre-index all-cause total costs**

|                                 |              |              |            |            |
|---------------------------------|--------------|--------------|------------|------------|
| Quartile 1 (<\$1,287):          | 1,198 (27.4) | 520 (16.8)   | 198 (21.0) | 322 (14.9) |
| Quartile 2 (\$1,287–\$3,817):   | 1,171 (26.8) | 629 (20.3)   | 204 (21.6) | 425 (19.7) |
| Quartile 3 (\$3,819–\$10,860):  | 1,070 (24.5) | 829 (26.7)   | 234 (24.8) | 595 (27.6) |
| Quartile 4 (\$10,865–\$645,097) | 932 (21.3)   | 1,124 (36.2) | 308 (32.6) | 816 (37.8) |

Note: All data are n (%) unless otherwise indicated.

NSAID – nonsteroidal anti-inflammatory drug, TIR – triptan insufficient responder.

\*Plan type - Other includes preferred provider organizations, exclusive provider organizations, and other unspecified organizations

\*\*Distinct medication classes for acute treatment of migraines includes butalbital combinations, ergots, NSAIDs, and opioids including opioid combinations.

**Appendix Table 4. Unadjusted Healthcare Resource Utilization Over Months 1–12 and Months 13–24 Post-Index**

|                                                 |      | Triptan Only Continuer<br>N = 4,371 |             | Potential TIR Patients<br>N = 3,102 |             |
|-------------------------------------------------|------|-------------------------------------|-------------|-------------------------------------|-------------|
|                                                 |      | Month<br>1–12                       | Month 13–24 | Month<br>1–12                       | Month 13–24 |
| <b>All Cause</b>                                |      |                                     |             |                                     |             |
| Inpatient visits                                | %    | 3.6%                                | 4.3%        | 11.2%                               | 11.4%       |
|                                                 | Mean | 0.05                                | 0.05        | 0.15                                | 0.15        |
| ED visits                                       | %    | 17.5%                               | 17.3%       | 37.4%                               | 34.8%       |
|                                                 | Mean | 0.26                                | 0.26        | 0.84                                | 0.78        |
| Outpatient service claims (excluding ED visits) | %    | 99.1%                               | 97.6%       | 99.7%                               | 98.5%       |
|                                                 | Mean | 12.77                               | 12.14       | 20.17                               | 19.06       |
| Physician office visits                         | %    | 98.2%                               | 96.4%       | 99.7%                               | 97.7%       |
|                                                 | Mean | 6.90                                | 6.24        | 11.07                               | 9.86        |
| Neurologist visits                              | %    | 25.4%                               | 17.3%       | 40.0%                               | 30.4%       |
|                                                 | Mean | 0.65                                | 0.40        | 1.38                                | 0.94        |
| <b>Migraine and/or Headache-Related</b>         |      |                                     |             |                                     |             |
| Inpatient visits                                | %    | 0.8%                                | 0.9%        | 6.4%                                | 5.4%        |
|                                                 | Mean | 0.01                                | 0.01        | 0.08                                | 0.06        |
| ED visits                                       | %    | 5.2%                                | 3.9%        | 19.0%                               | 15.1%       |
|                                                 | Mean | 0.06                                | 0.05        | 0.33                                | 0.28        |
| Outpatient service claims (excluding ED visits) | %    | 80.3%                               | 53.5%       | 95.8%                               | 70.4%       |
|                                                 | Mean | 2.21                                | 1.35        | 4.55                                | 3.01        |
| Physician office visits                         | %    | 78.1%                               | 50.4%       | 93.2%                               | 65.9%       |
|                                                 | Mean | 1.71                                | 0.97        | 3.24                                | 2.06        |
| Neurologist visits                              | %    | 23.0%                               | 14.6%       | 37.0%                               | 26.1%       |
|                                                 | Mean | 0.53                                | 0.30        | 1.13                                | 0.72        |

ED – emergency department; TIR – triptan insufficient responder.

**Appendix Table 5. Unadjusted Healthcare Costs Over Months 1–12 and Months 13–24 Post-Index**

|                                                     | Triptan Only Continuer<br>N = 4,371 |                | Potential TIR Patients<br>N = 3,102 |                |
|-----------------------------------------------------|-------------------------------------|----------------|-------------------------------------|----------------|
|                                                     | Month<br>1–12                       | Month<br>13–24 | Month<br>1–12                       | Month<br>13–24 |
| <b>All-Cause Total Costs</b>                        | \$8,410                             | \$8,504        | \$18,159                            | \$18,750       |
| Medical                                             | \$6,267                             | \$6,421        | \$14,809                            | \$15,158       |
| Inpatient                                           | \$725                               | \$929          | \$2,604                             | \$3,023        |
| ED                                                  | \$729                               | \$751          | \$2,357                             | \$2,156        |
| Outpatient <sup>a</sup>                             | \$4,812                             | \$4,741        | \$9,848                             | \$9,979        |
| Evaluation & management visits                      | \$748                               | \$672          | \$1,227                             | \$1,081        |
| Neurologist visits <sup>b</sup>                     | \$166                               | \$114          | \$369                               | \$299          |
| Prescription                                        | \$2,143                             | \$2,083        | \$3,350                             | \$3,592        |
| <b>Migraine and/or Headache-Related Total Costs</b> | \$1,321                             | \$978          | \$5,070                             | \$4,456        |
| Medical                                             | \$832                               | \$633          | \$4,128                             | \$3,655        |
| Inpatient                                           | \$104                               | \$134          | \$1,313                             | \$1,436        |
| ED                                                  | \$201                               | \$150          | \$1,023                             | \$796          |
| Outpatient <sup>a</sup>                             | \$496                               | \$315          | \$1,639                             | \$1,241        |
| OnabotulinumtoxinA (medical claims)                 | \$32                                | \$34           | \$153                               | \$181          |
| Evaluation & management visit                       | \$198                               | \$109          | \$379                               | \$233          |
| Neurologist visits <sup>b</sup>                     | \$89                                | \$50           | \$212                               | \$140          |
| Prescription                                        | \$489                               | \$345          | \$941                               | \$802          |
| OnabotulinumtoxinA (prescription claims)            | \$3                                 | \$5            | \$10                                | \$10           |
| Acute medication                                    | \$347                               | \$212          | \$506                               | \$356          |
| Oral migraine preventive medication                 | \$112                               | \$102          | \$177                               | \$190          |

<sup>a</sup> Excluded ED visits.

<sup>b</sup> Includes any evaluation and management visit claims with neurology specialist  
ED – emergency department; TIR – triptan insufficient responder.
