# Supplementary figures and images for: Comparison of healthcare resource utilization and costs among patients with migraine with potentially adequate and insufficient triptan response
Source: PubMed Central journal article supplement — Cephalalgia. 2020 Mar 29;40(7):639–49. doi: 10.1177/0333102420915167 (PMC7273744; doi:10.1177/0333102420915167), 2020-03-29

## Appendix Figure 1. Study Sample Attrition

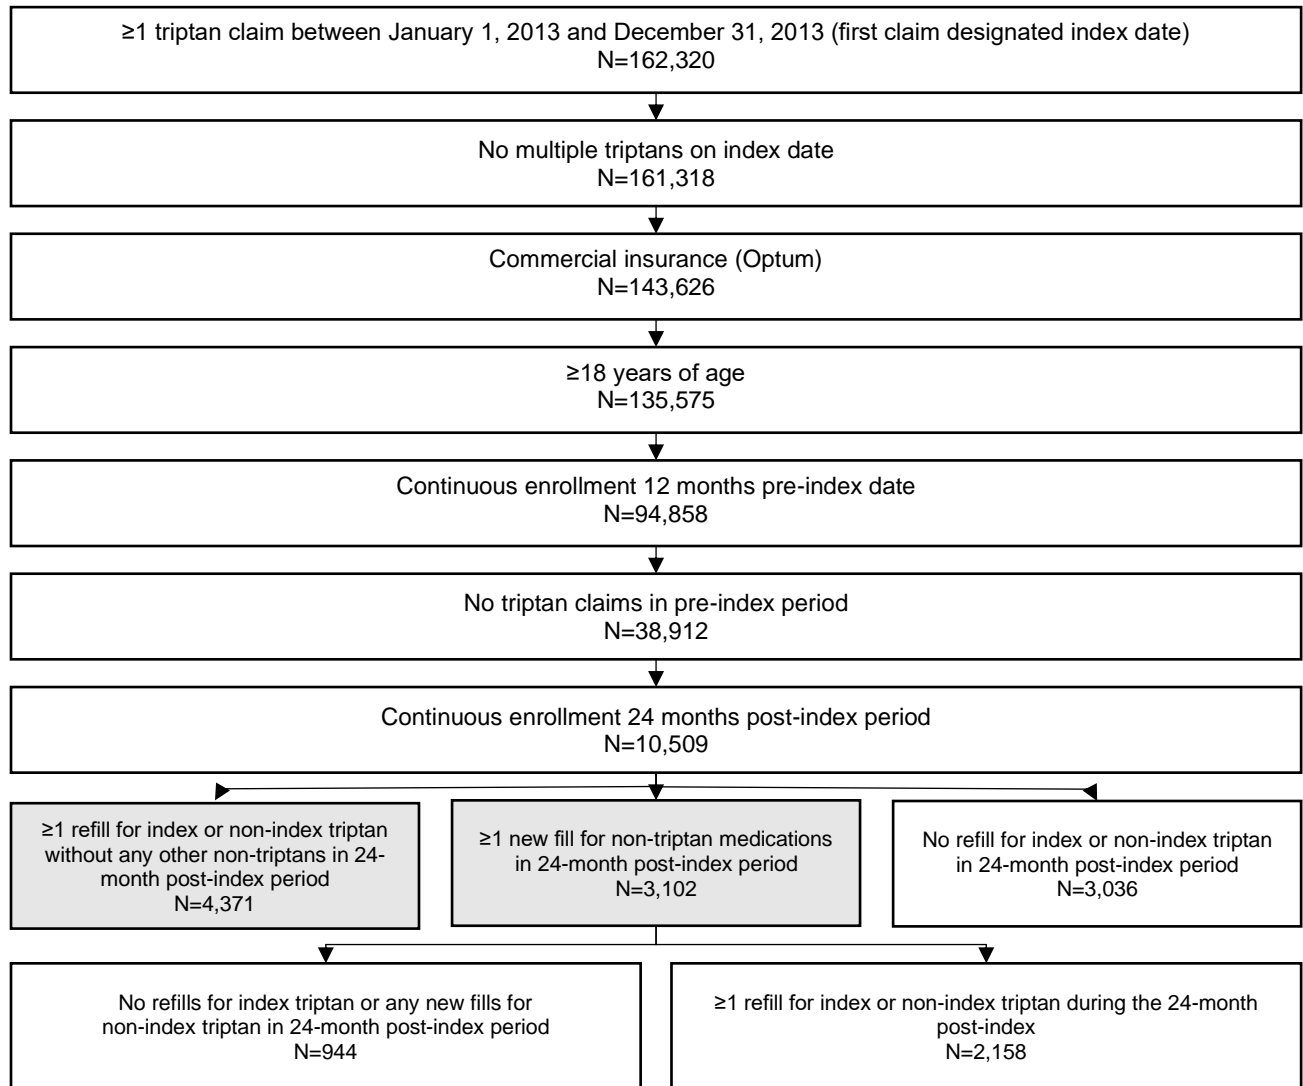

Supplement: CEP915167_Supplemental_Figure_1.pdf [file CEP915167_Supplemental_Figure_1.pdf]
